# Supplementary material
Source: MDPI journal article supplement (https://www.mdpi.com/2073-4395/11/8/1538)
Supplement: s1 [file s1]

## Supplementary Materials

**Table S1.** List of synonyms found in our study and comparison with synonyms recognized by the Italian National Registry of Grape Varieties.

| Variety         | Synonymies found in this study | Recognized by the Italian National Registry of Grape Varieties |
|-----------------|--------------------------------|----------------------------------------------------------------|
| Brettio Nero    | Mantonico Nero                 | No                                                             |
| Magliocco Dolce | Magliocco Sanmarco             | No                                                             |
|                 | Magliocco Falvo                | No                                                             |
|                 | Arvino                         | Yes                                                            |
|                 | Lagrima Nera                   | No                                                             |
| Moscato Bianco  | Moscato Reale                  | Yes                                                            |

**Table S2.** Molecular profile obtained for the ARSAC-authenticated accessions and comparison with the profiles contained in the Vitis International Variety Catalogue (VIVC).

| Accession name            | Molecular marker locus |     |       |     |       |     |        |     |        |     |        |     |        |     |        |     |         |     |         |     |         |     |         |     |
|---------------------------|------------------------|-----|-------|-----|-------|-----|--------|-----|--------|-----|--------|-----|--------|-----|--------|-----|---------|-----|---------|-----|---------|-----|---------|-----|
|                           | VVS2                   |     | VVMD5 |     | VVMD7 |     | VVMD21 |     | VVMD25 |     | VVMD27 |     | VVMD28 |     | VVMD32 |     | VrZAG21 |     | VrZAG62 |     | VrZAG64 |     | VrZAG79 |     |
| GRECO NERO (ARSAC)        | 133                    | 143 | 228   | 228 | 249   | 249 | 250    | 250 | 241    | 255 | 178    | 178 | 228    | 260 | 250    | 250 | 191     | 191 | 200     | 202 | 141     | 159 | 251     | 255 |
| GRECO NERO (VIVC)         | 135                    | 137 | 228   | 228 | 239   | 247 | -      | -   | 255    | 255 | 190    | 195 | 218    | 244 | 250    | 250 | -       | -   | -       | -   | -       | -   | -       | -   |
| GUARNACCIA BIANCA (ARSAC) | 143                    | 151 | 226   | 240 | 247   | 247 | 246    | 258 | 255    | 255 | 178    | 178 | 228    | 248 | 252    | 256 | 203     | 205 | 194     | 204 | 141     | 189 | 251     | 259 |
| GUARNACCIA BIANCA (VIVC)  | 133                    | 143 | 228   | 248 | 243   | 253 | -      | -   | 241    | 255 | 180    | 195 | 248    | 258 | 260    | 274 | -       | -   | 194     | 202 | -       | -   | 253     | 263 |
| MAGLIOCCO DOLCE (ARSAC)   | 133                    | 143 | 234   | 238 | 247   | 263 | 250    | 250 | 241    | 249 | 190    | 195 | 244    | 248 | 252    | 258 | 191     | 207 | 194     | 196 | 137     | 143 | 249     | 251 |
| MAGLIOCCO DOLCE (VIVC)    | 133                    | 143 | 234   | 238 | 247   | 263 | -      | -   | 241    | 249 | 190    | 195 | 244    | 248 | 252    | 258 | -       | -   | 194     | 196 | -       | -   | 249     | 251 |
| BRETTIO NERO (ARSAC)      | 133                    | 143 | 228   | 234 | 239   | 239 | 250    | 258 | 241    | 249 | 180    | 190 | 228    | 258 | 252    | 258 | 201     | 207 | 188     | 202 | 141     | 141 | 251     | 251 |
| BRETTIO NERO (VIVC)       | 133                    | 143 | 228   | 234 | 239   | 239 | -      | -   | 241    | 249 | 180    | 190 | 228    | 258 | 252    | 258 | -       | -   | 188     | 202 | -       | -   | 251     | 251 |
